# Supplementary material
Source: Research Square preprint supplement (doi:10.21203/rs.3.rs-7191689/v1)
Supplement: Supplementary file 1 [file 8ae9127e6bb8f914ca749507.pdf]

## **Supplementary Information**

### **Chronic kidney disease defined by 24-hour urinary albumin and silent brain infarction in community-dwelling older adults**

Kenji Fukuda, Hiroshi Yao, Masahiro Kamouchi, Toru Nabika, Mari Mori, Hideki Mori, Yasushi Okada, Tetsuro Ago & Yukio Yamori

**Supplementary Table S1.** Odds ratios for silent brain infarction (SBI) according to microalbuminuria and eGFR levels

|                                                        | Number of SBI+ (%) | Model 1 |            |        | Model 2 |            |       |
|--------------------------------------------------------|--------------------|---------|------------|--------|---------|------------|-------|
|                                                        |                    | OR      | 95% CI     | P      | OR      | 95% CI     | P     |
| Microalbuminuria levels (mg/day) <sup>a</sup>          |                    |         |            |        |         |            |       |
| Non-microalbuminuria, n=266                            | 17 (6.4)           | 1.00    | reference  |        | 1.00    | reference  |       |
| Microalbuminuria, n=27                                 | 8 (29.6)           | 7.11    | 2.59-19.55 | <0.001 | 5.47    | 1.90-15.72 | 0.002 |
| eGFR levels (mL/min/1.73 m <sup>2</sup> ) <sup>b</sup> |                    |         |            |        |         |            |       |
| ≥ 60, n=235                                            | 19 (8.1)           | 1.00    | reference  |        | 1.00    | reference  |       |
| < 60, n=58                                             | 6 (10.3)           | 1.04    | 0.39-2.80  | 0.94   | 0.89    | 0.33-2.42  | 0.81  |

Model 1: adjusted for age and sex. Model 2: further adjusted for hypertension. Abbreviations: SBI, silent brain infarction; OR, odds ratio; CI, confidence interval; eGFR, estimated glomerular filtration rate.

<sup>a</sup> Microalbuminuria was defined as persistent urinary albumin excretion between 30 and 299 mg/day. Three participants with macroalbuminuria (≥ 300 mg/day) were excluded from this analysis.

<sup>b</sup> For consistency, the same three participants with macroalbuminuria (≥300 mg/day) were also excluded from the eGFR analysis.

Panel A

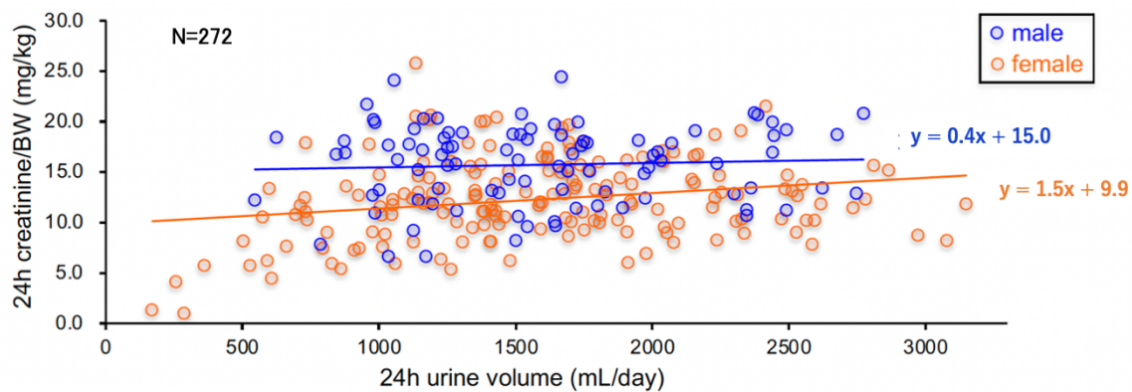

Panel B

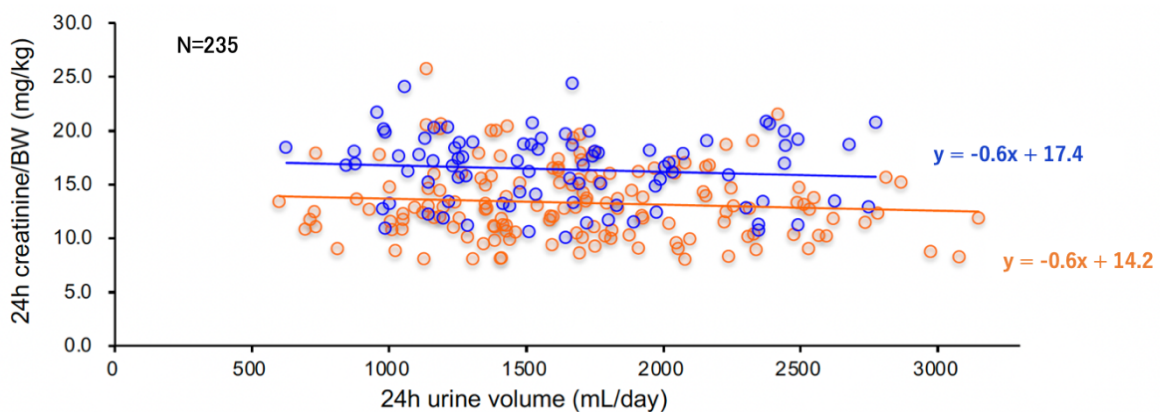

**Supplementary Figure S1. Preliminary validation of quality control thresholds for 24-hour urine data using health checkup participants (2015–2018).**

This figure presents a preliminary validation analysis using data from 272 community-dwelling adults who underwent health checkups between 2015 and 2018, a subset of the study period, prior to the final participant selection for the primary analysis. To ensure the reliability of 24-h urine measurements, both urinary creatinine excretion and urine volume were evaluated.

**Panel A:** distribution of all 272 participants by daily urinary creatinine excretion (adjusted for body weight) and urine volume. Participants with creatinine excretion  $< 9.7$  mg/kg/day for males or  $< 7.8$  mg/kg/day for females, or with urine volume  $< 1,000$  mL/day, were considered to have incomplete urine collections.

**Panel B:** relationship between creatinine excretion and urine volume among the 235 participants who met quality control criteria. The near-zero regression slopes (males:  $y = -0.6x + 17.4$ ; females:  $y = -0.6x + 14.2$ ) indicate that, after exclusion of incomplete samples, creatinine excretion is largely independent of urine volume.

These thresholds led to the exclusion of 37 participants (13.6%) and were based on physiologically plausible ranges observed in Japanese adults. The criteria are consistent with quality control standards used in previous urine collection studies.

For the present cross-sectional analysis, we focused on the 2015–2018 dataset. Although additional data from 2019 are available, they will be used in future research aimed at investigating home-based urine collection adherence and gender-related variability, which require distinct analytical frameworks.
